# Supplementary material for: Mitochondrial injury induced by a Salmonella genotoxin triggers the proinflammatory senescence-associated secretory phenotype
Source: PubMed Central journal article supplement (PMC10981749; doi:10.1038/s41467-024-47190-y), 2024-03-30
Supplement: 41467_2024_47190_MOESM3_ESM.pdf [file 41467_2024_47190_MOESM3_ESM.pdf]

## Description of Additional Supplementary Files

**File Name:** Supplementary Data 1

**Description:** All the plasmids used in the study.

**File Name:** Supplementary Data 2

**Description:** All antibodies and reagents used in the study are listed with their respective sources and identifiers.

**File Name:** Supplementary Data 3

**Description:** The oligonucleotide sequences of all primers and sgRNAs are provided in this study.
